# Supplementary material for: Application of the Triazolization Reaction to Afford Dihydroartemisinin Derivatives with Anti-HIV Activity
Source: PubMed Central journal article supplement (PMC6155659; doi:10.3390/molecules22020303), 2017-02-17
Supplement: molecules-22-00303-s001.pdf [file molecules-22-00303-s001.pdf]

# Supplementary Materials: Application of the Triazolization Reaction to Afford Derivatives of Dihydroartemisinin Having Anti-HIV Activity

Sampad Jana, Shabina Iram, Joice Thomas, Muhammad Qasim Hayat, Christophe Pannecouque and Wim Dehaen

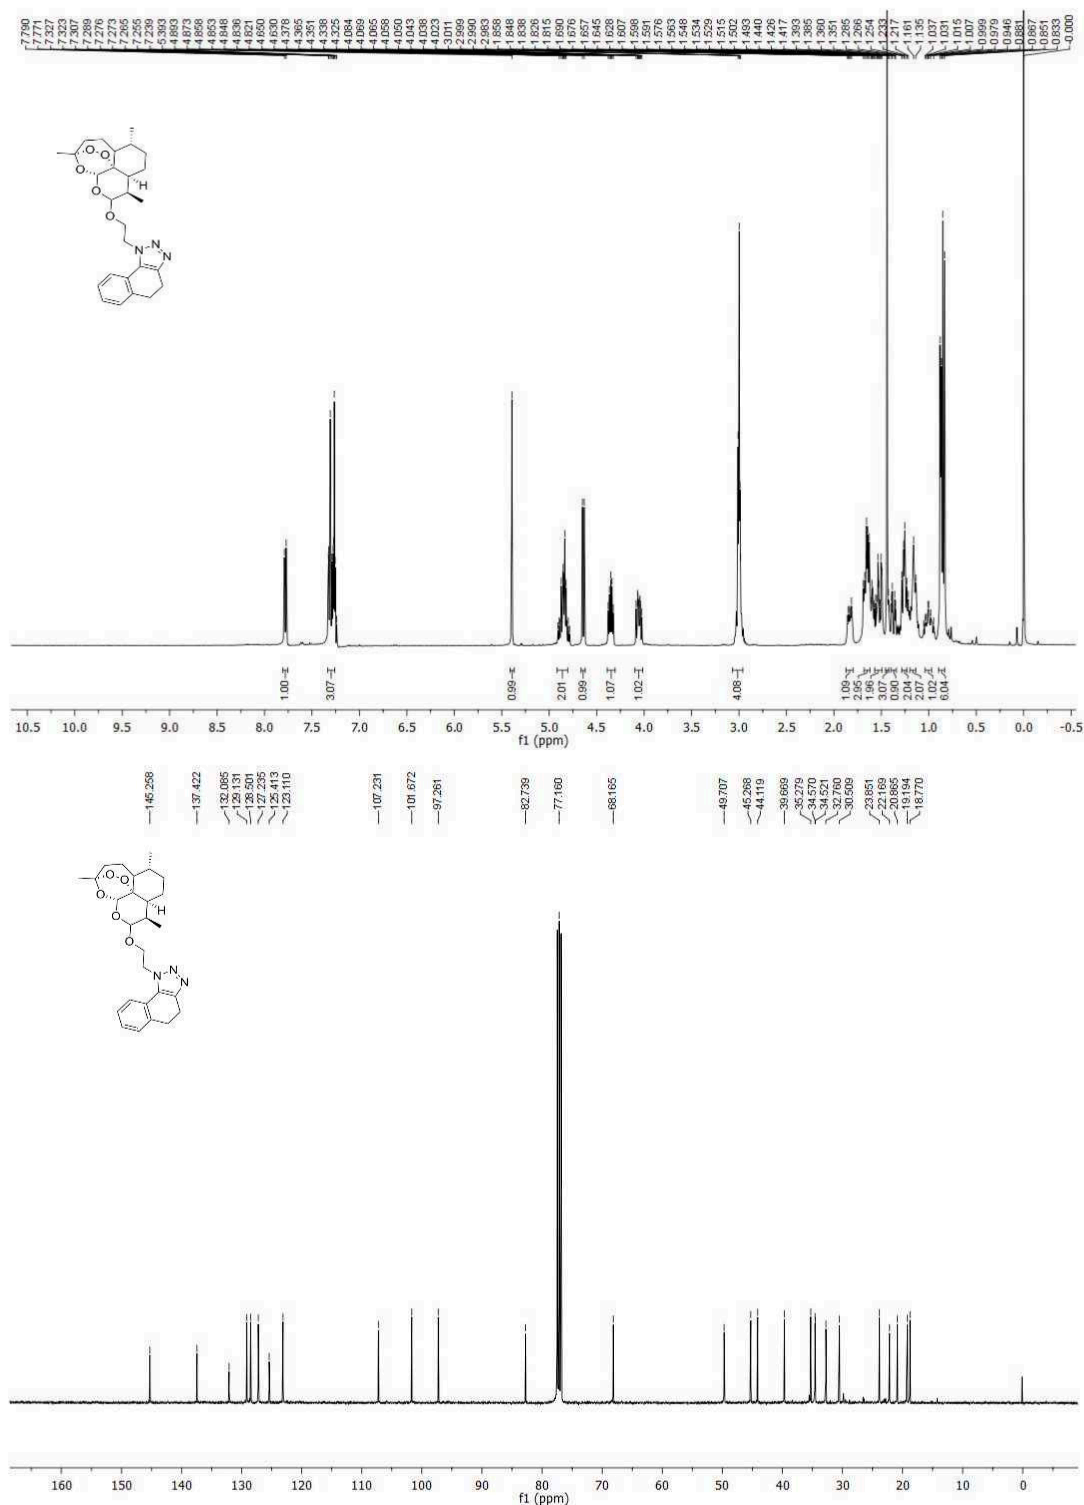

Figure S1. <sup>1</sup>H and <sup>13</sup>C spectra of 8a.

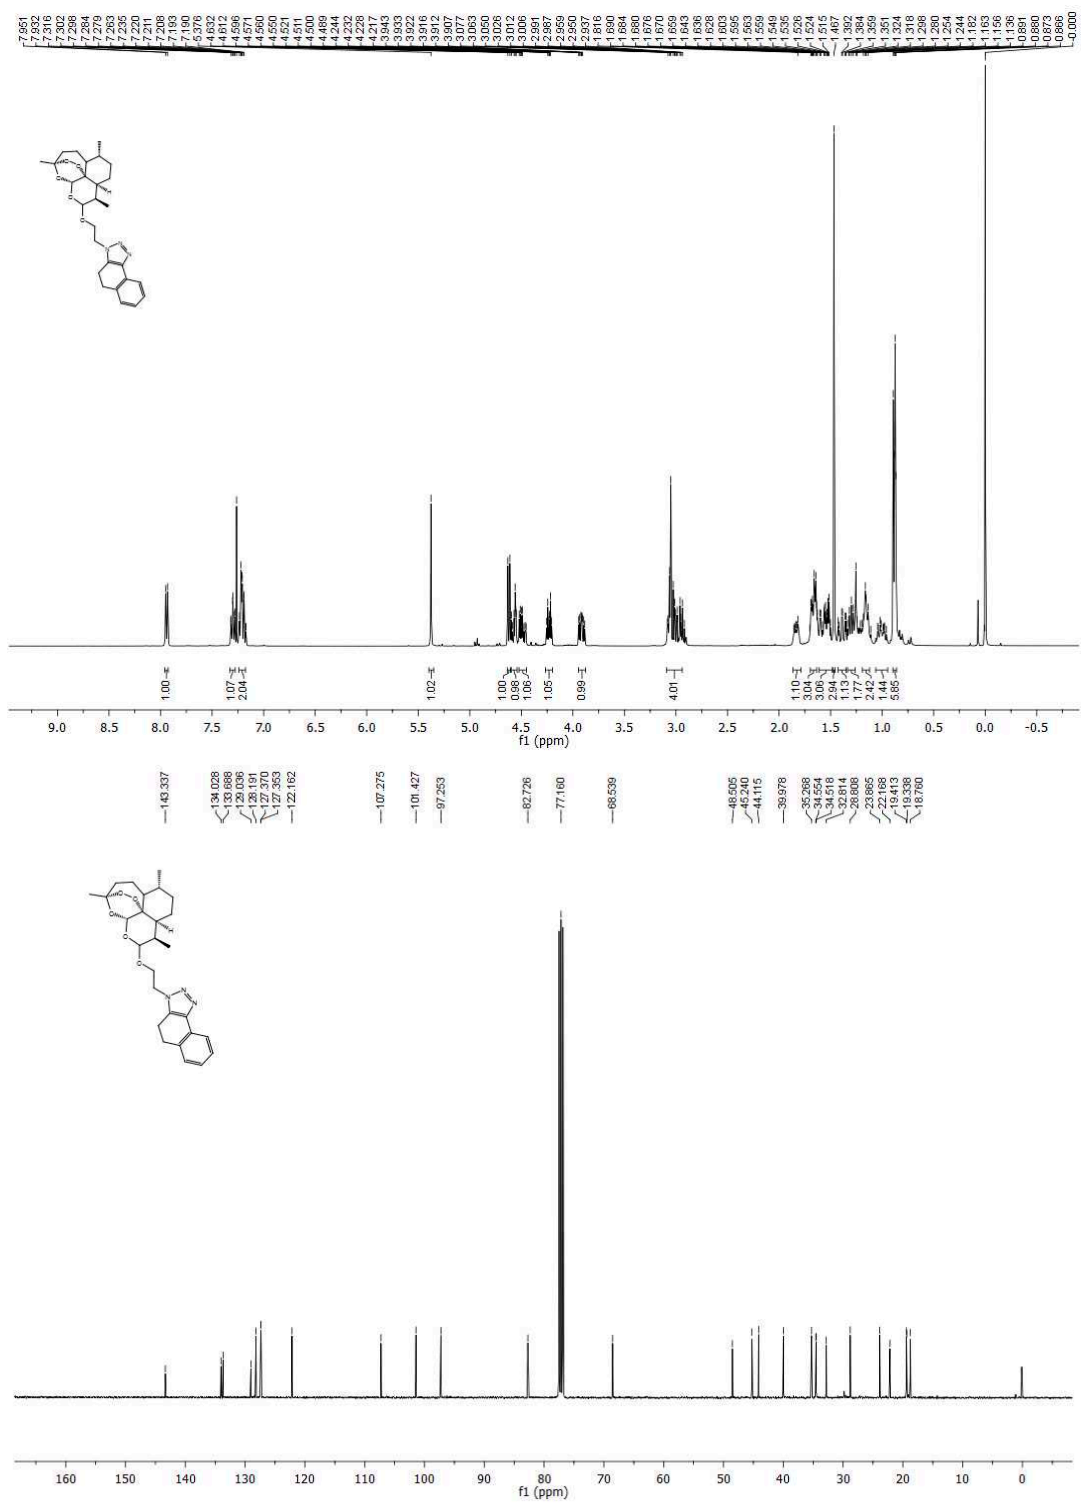

Figure S2. <sup>1</sup>H and <sup>13</sup>C spectra of 8b.

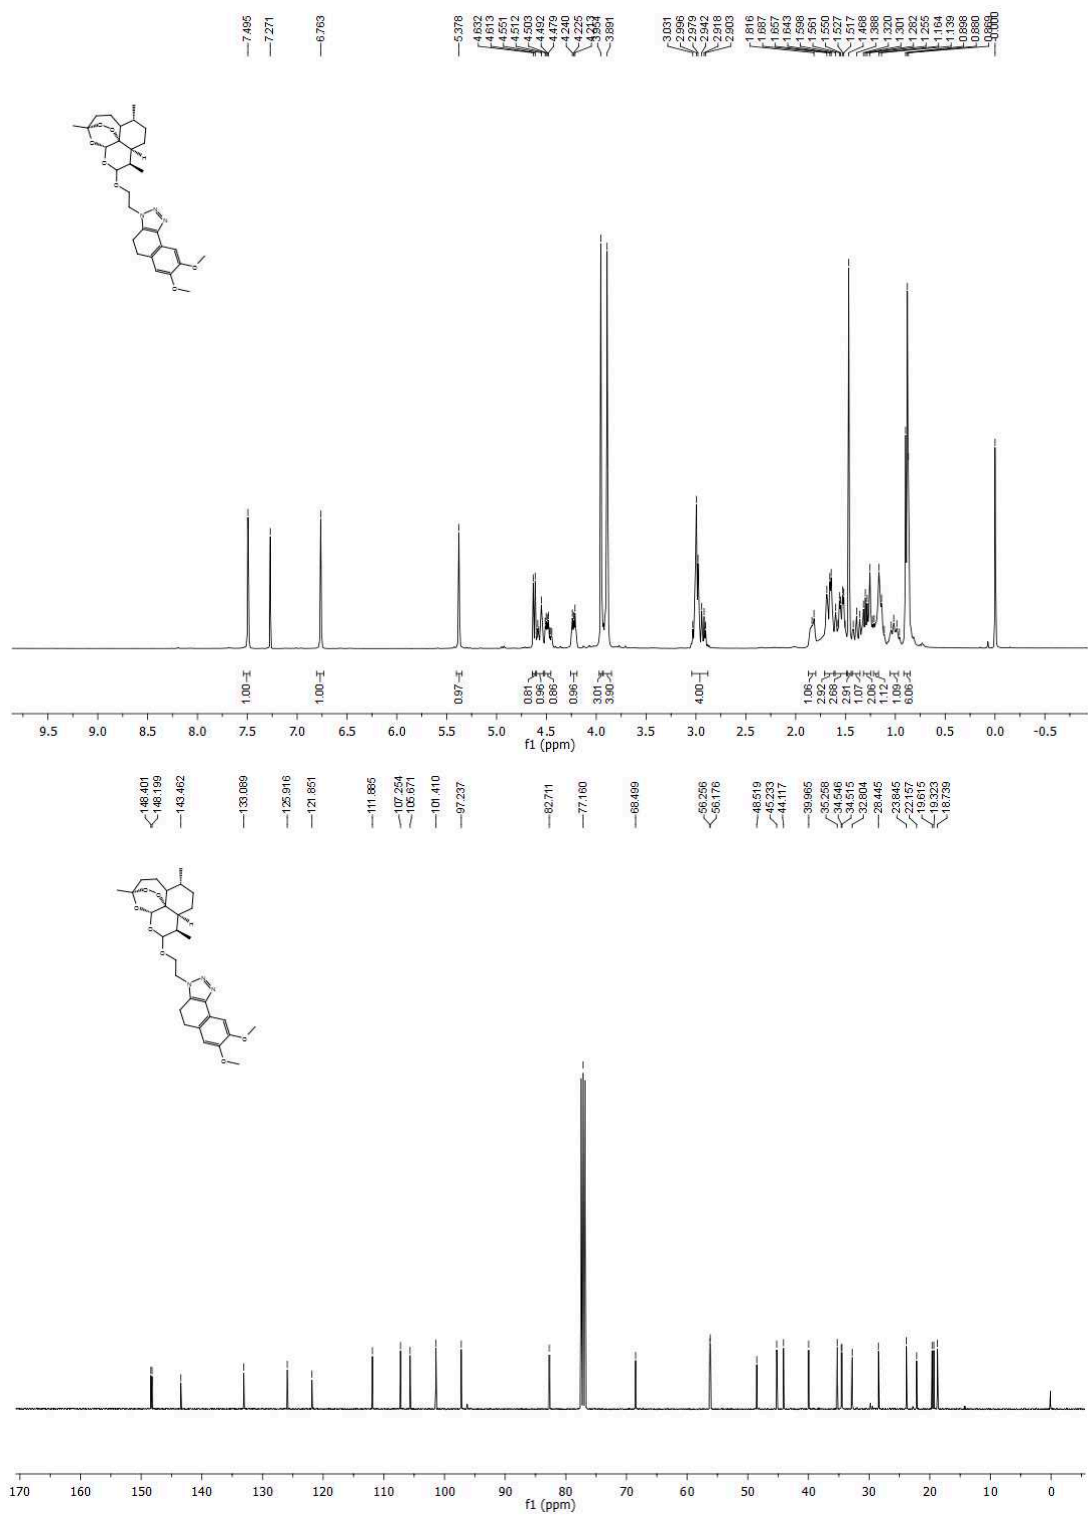

Figure S3. <sup>1</sup>H and <sup>13</sup>C spectra of 8c.

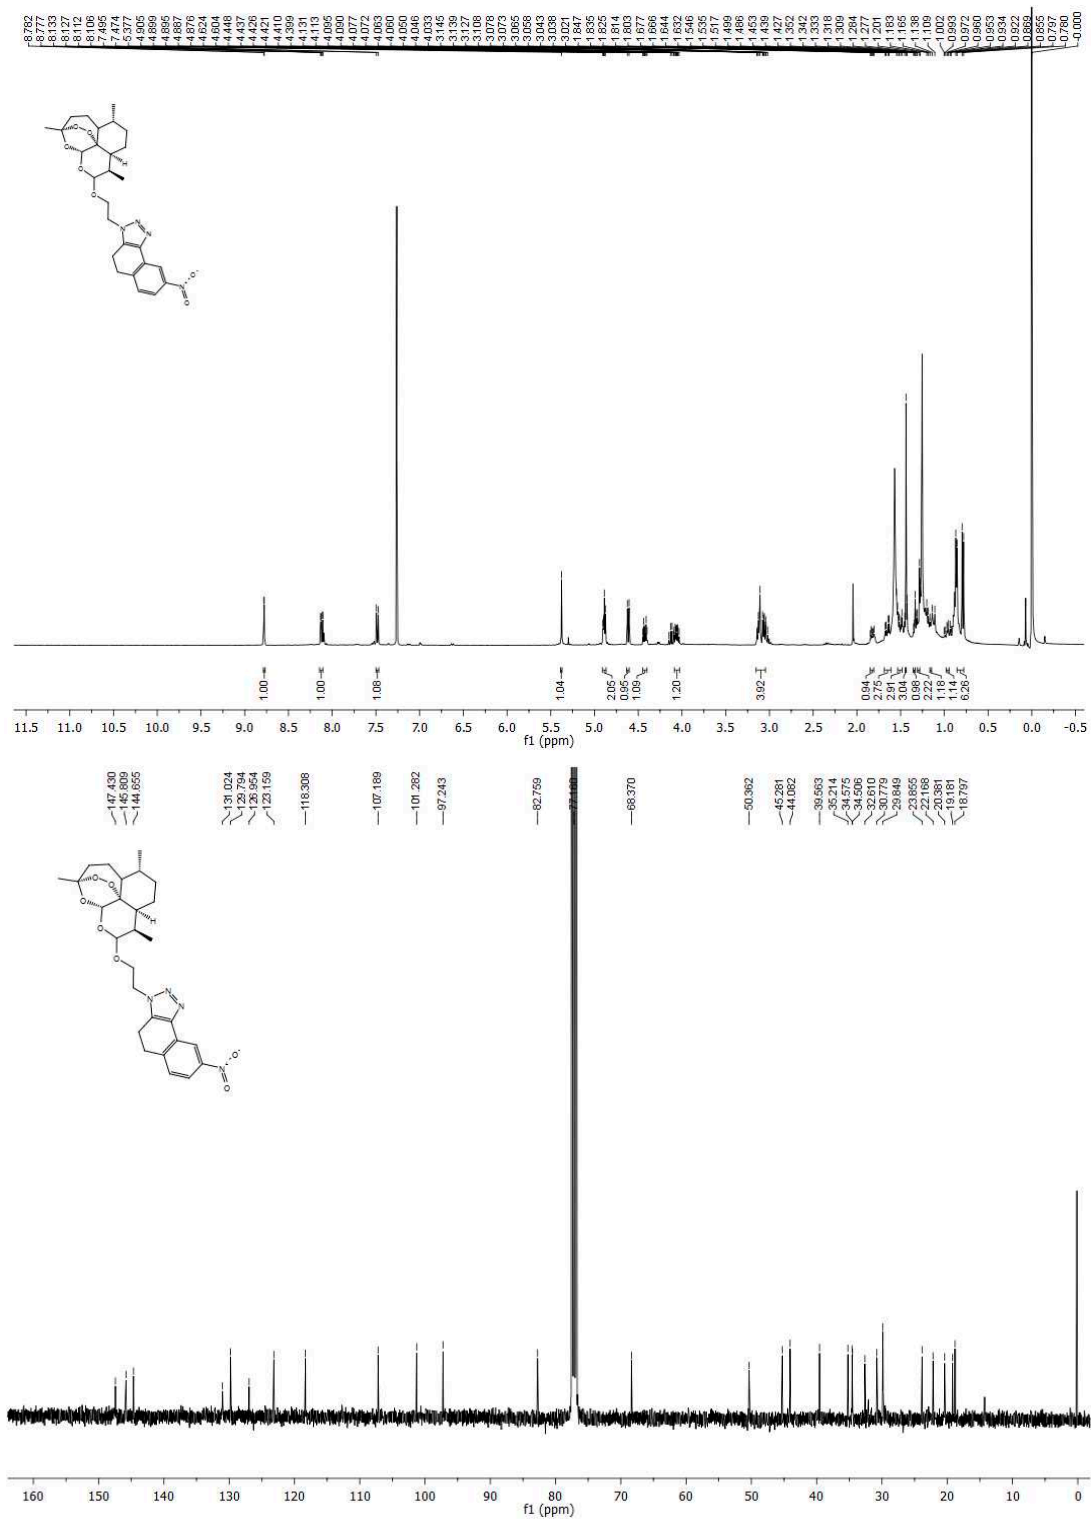

Figure S4. <sup>1</sup>H and <sup>13</sup>C spectra of 8d.

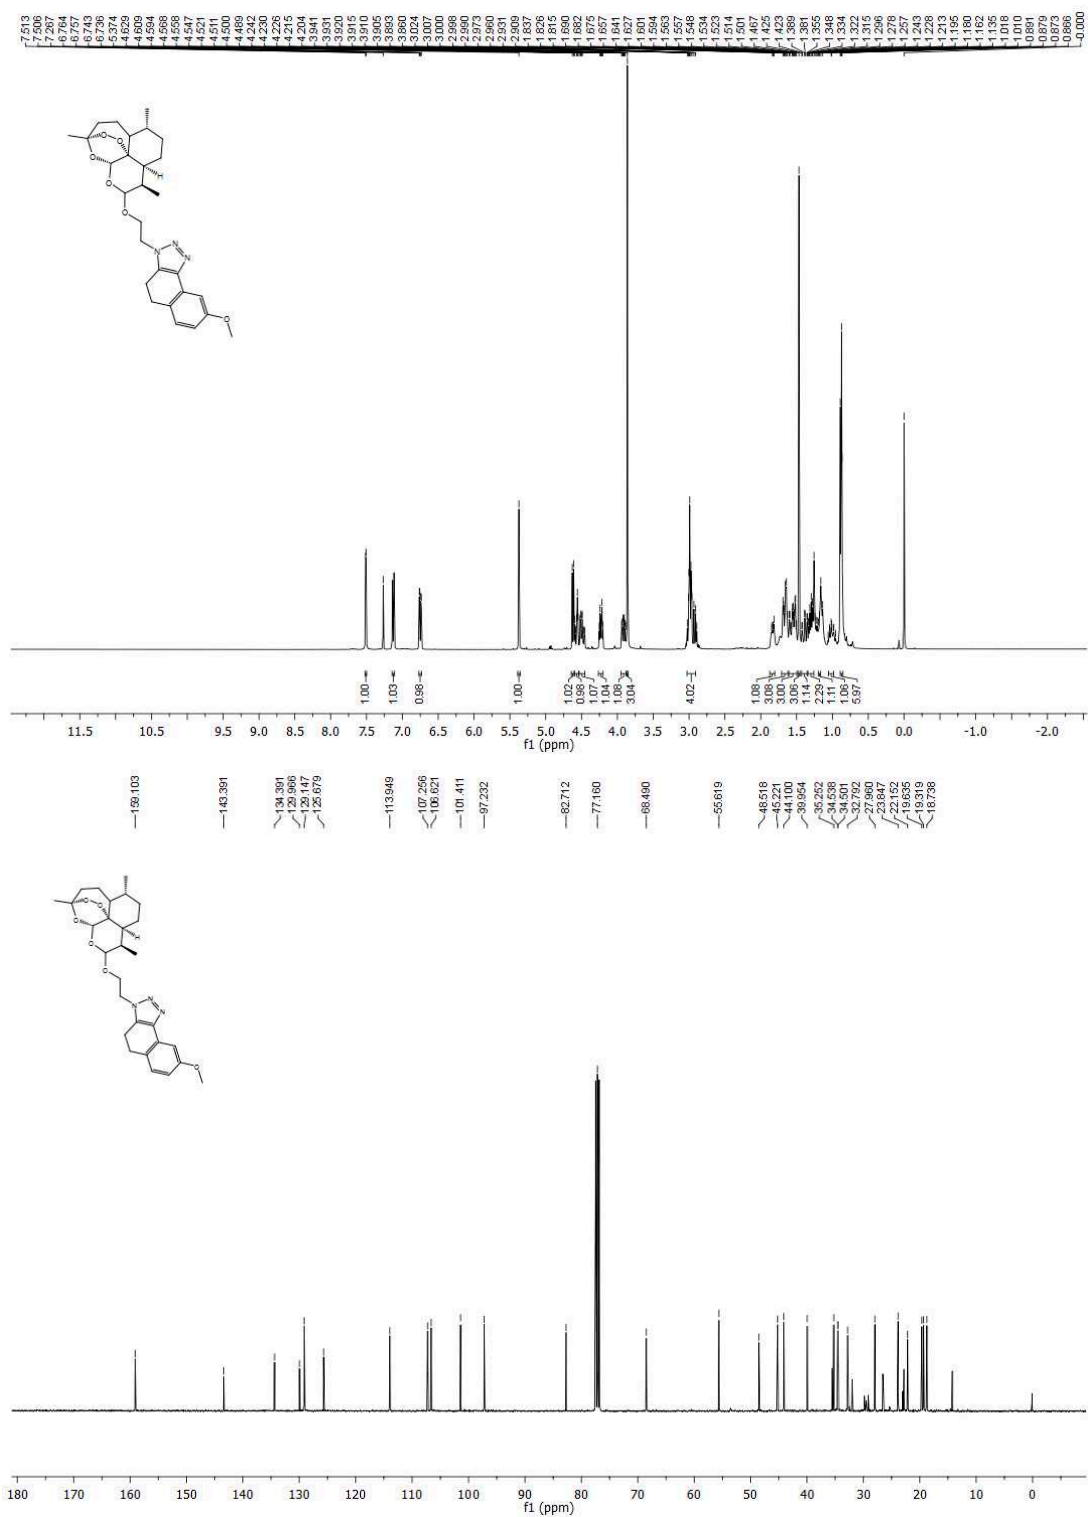

Figure S5. <sup>1</sup>H and <sup>13</sup>C spectra of **8e**.

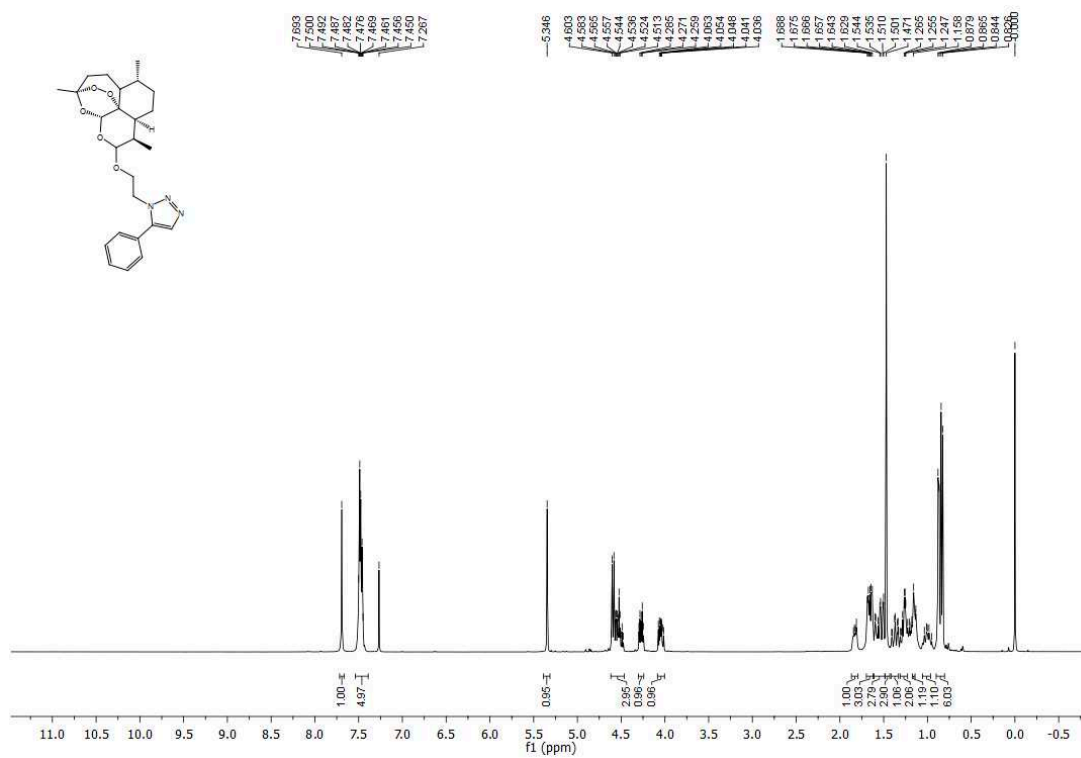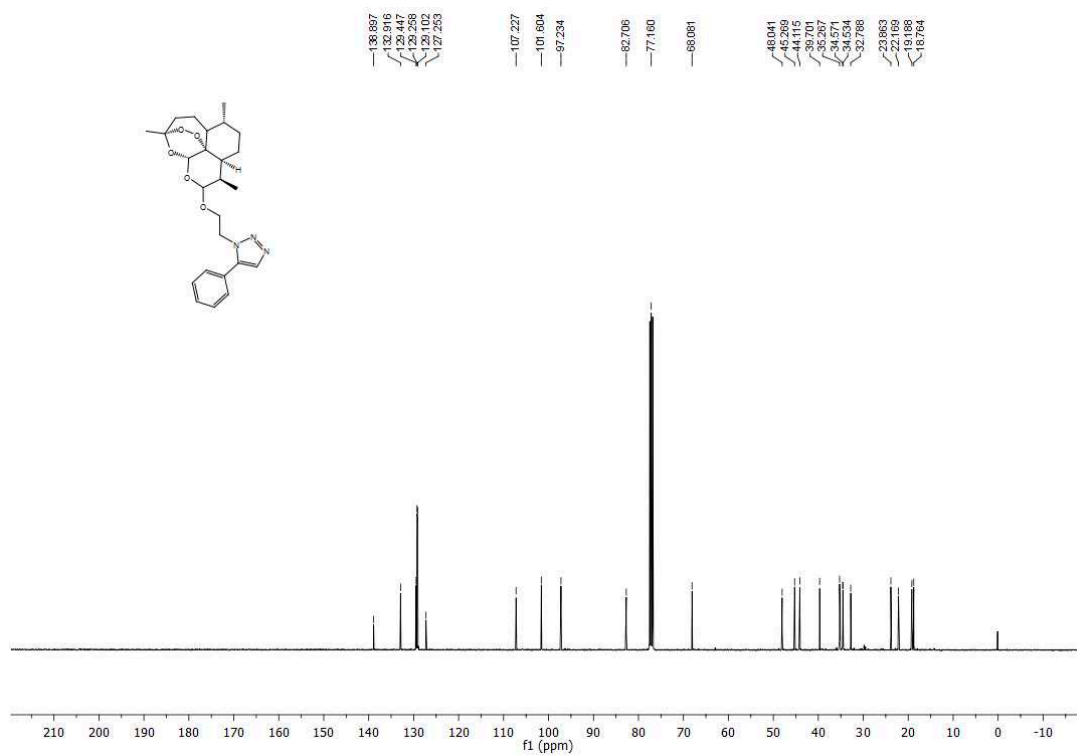

Figure S6. <sup>1</sup>H and <sup>13</sup>C spectra of 8f.

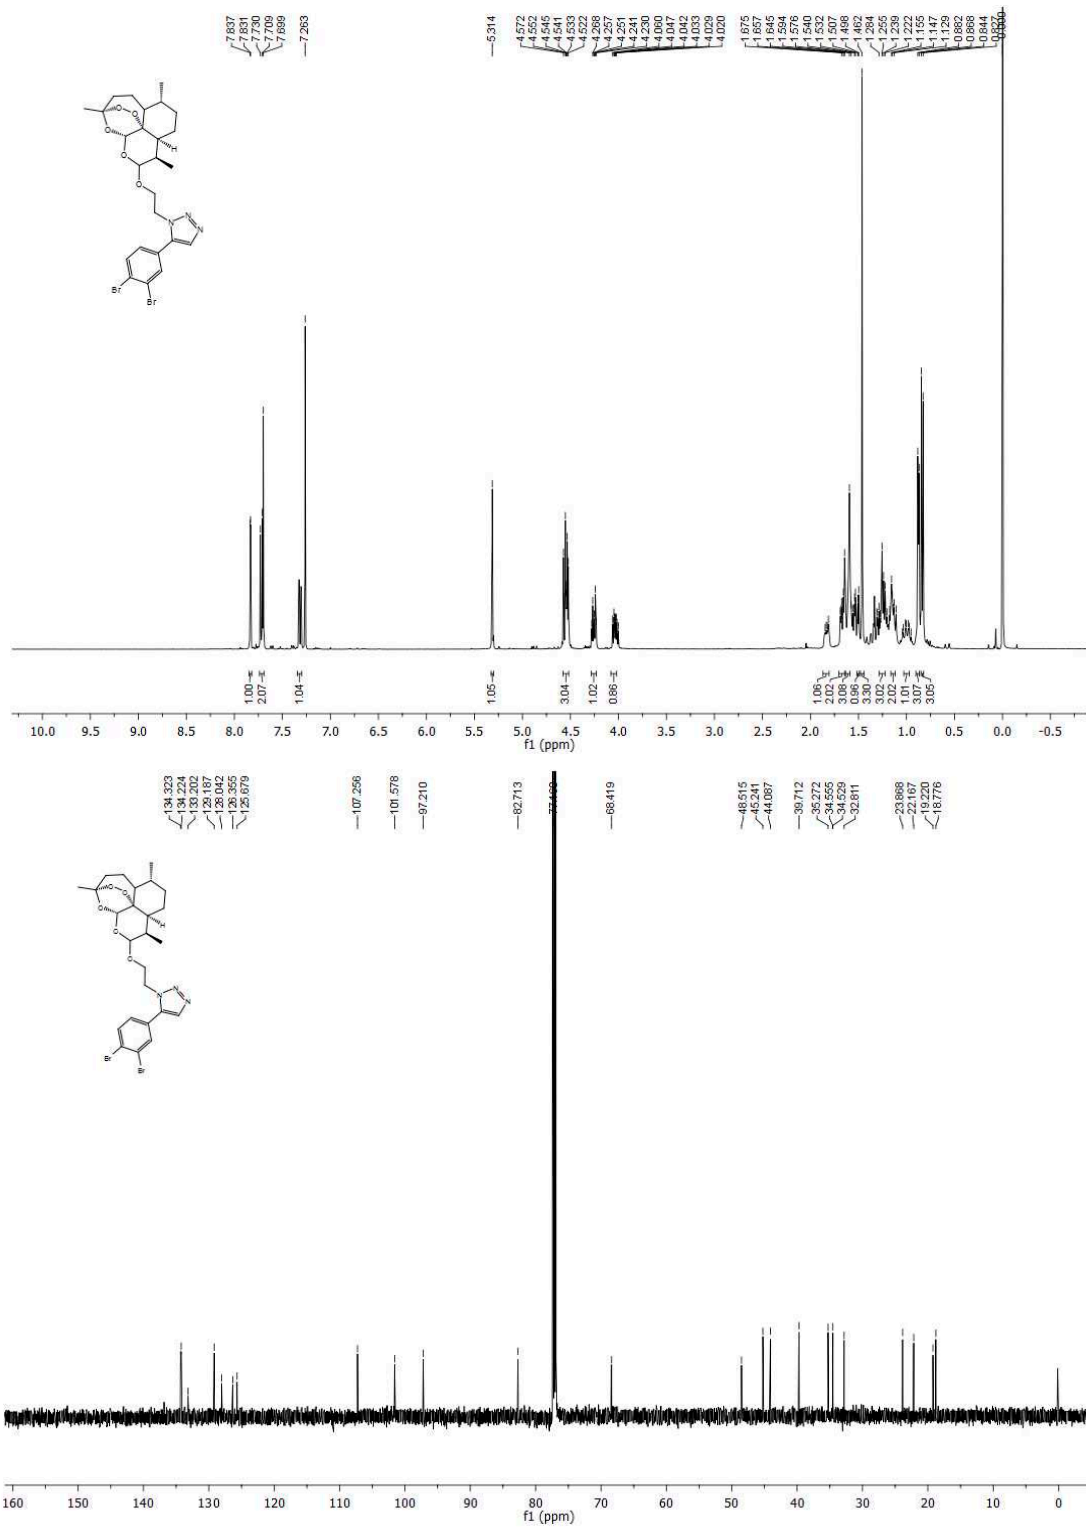

Figure S7. <sup>1</sup>H and <sup>13</sup>C spectra of 8g.

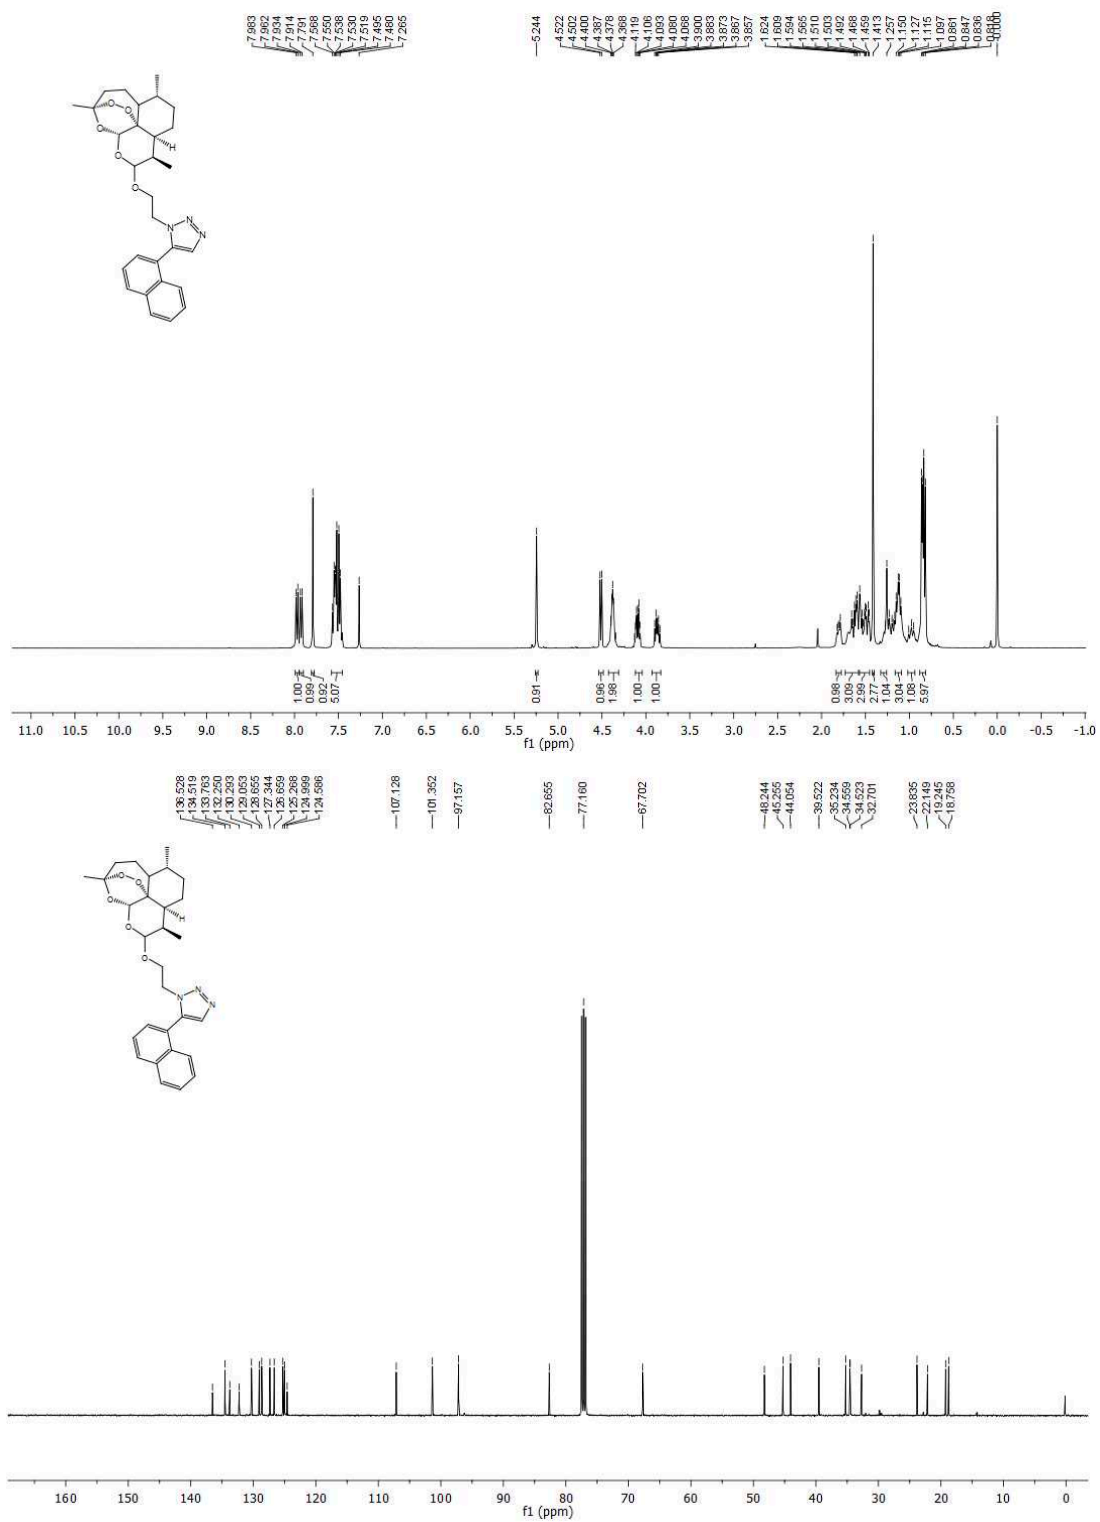

Figure S8. <sup>1</sup>H and <sup>13</sup>C spectra of 8h.



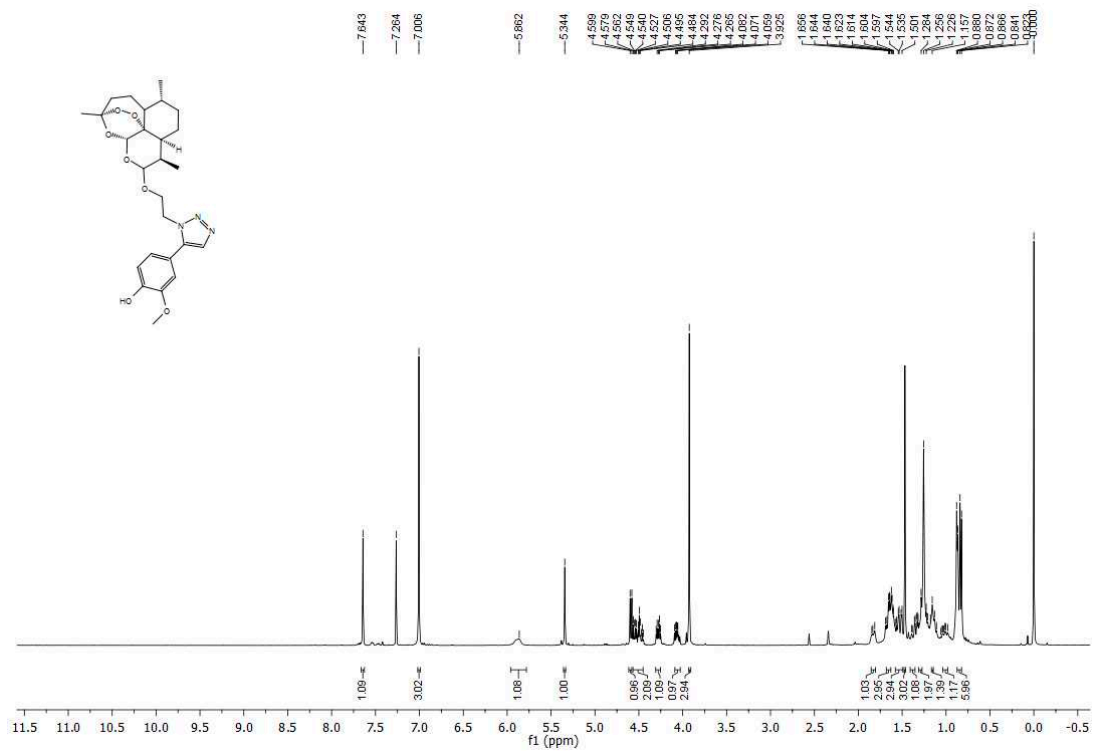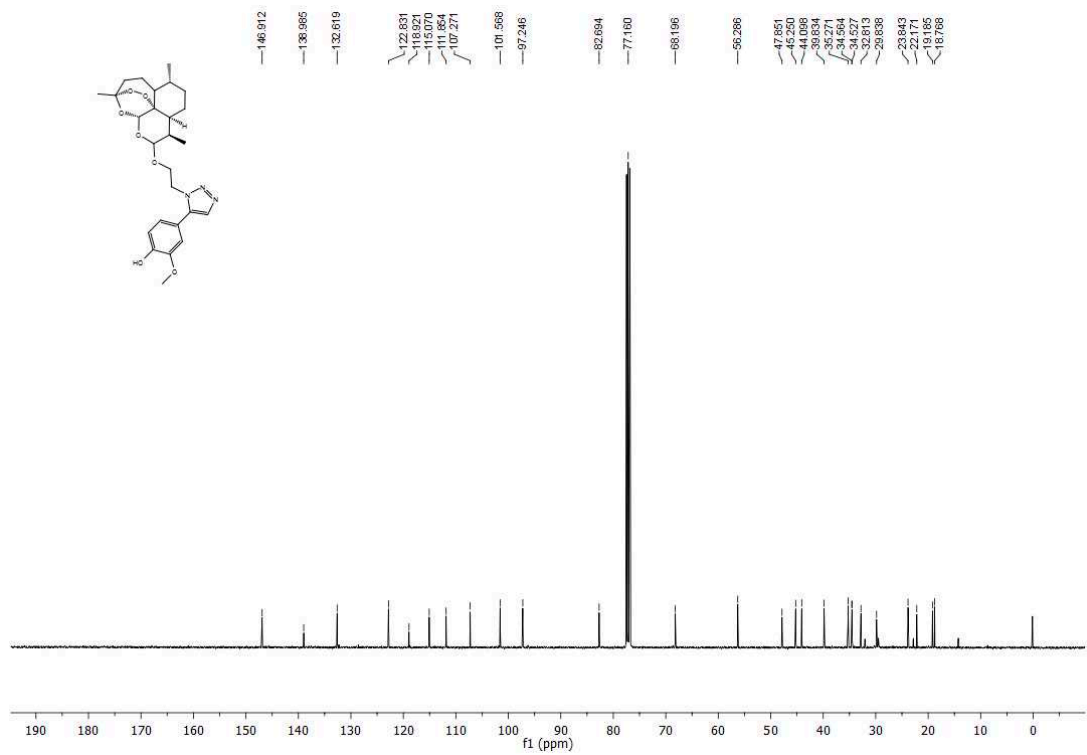

Figure S9.  $^1\text{H}$  and  $^{13}\text{C}$  spectra of 8i.

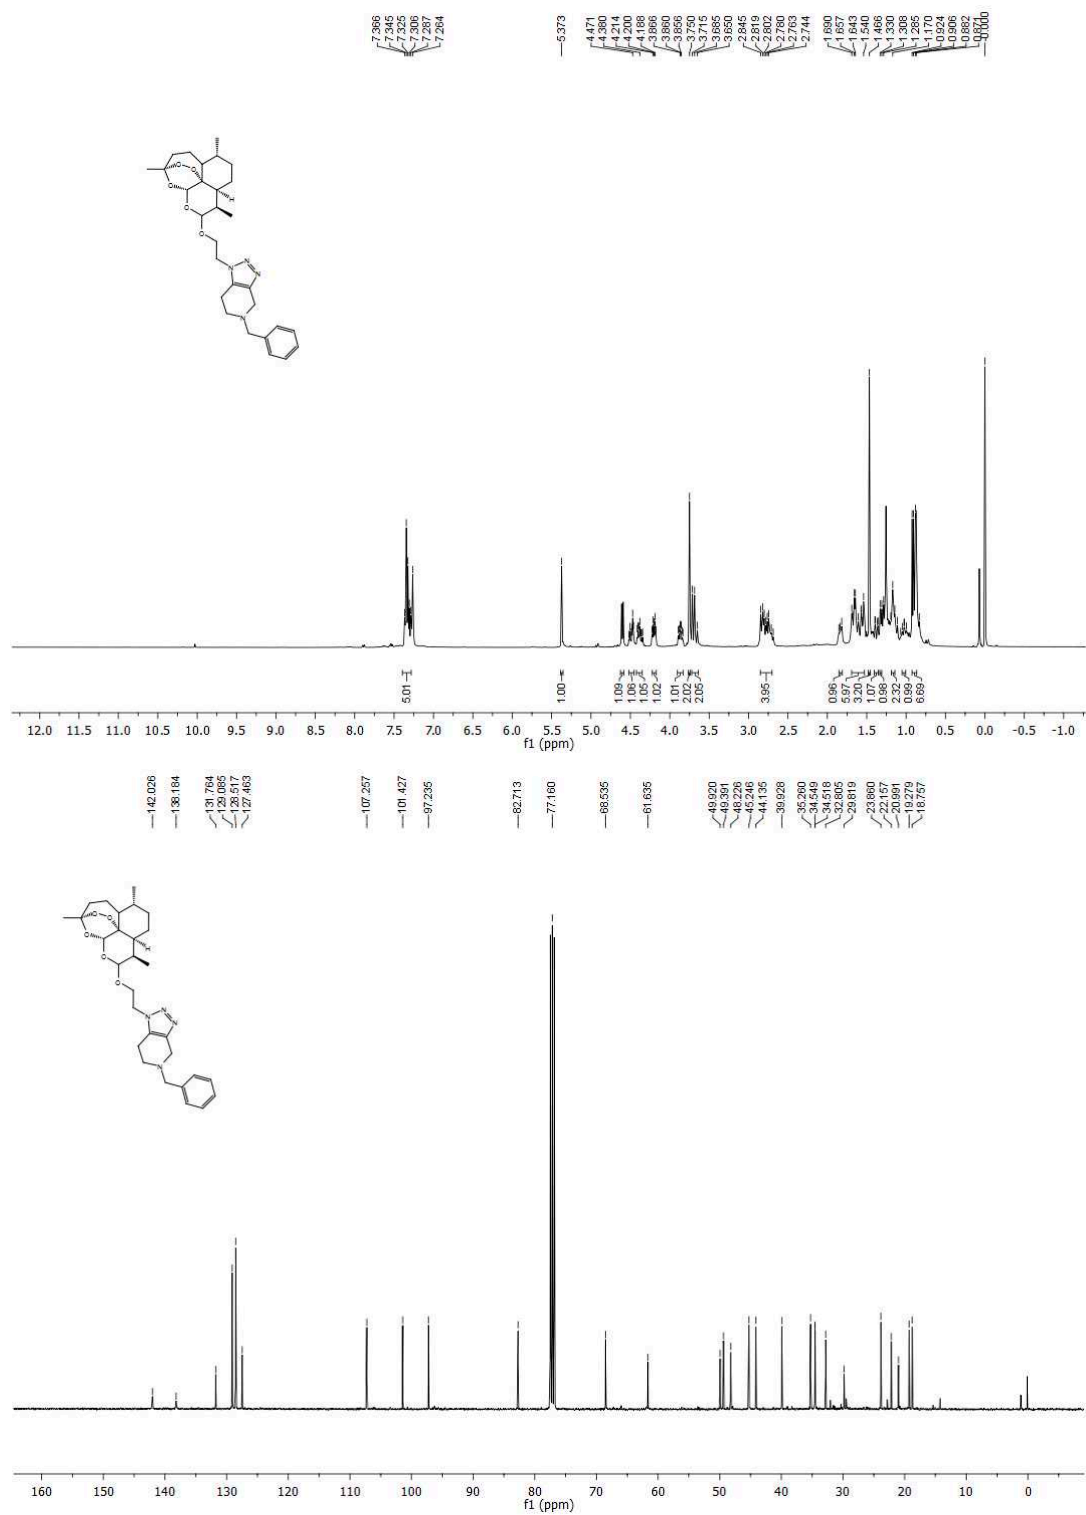

Figure S10. <sup>1</sup>H and <sup>13</sup>C spectra of 8j.

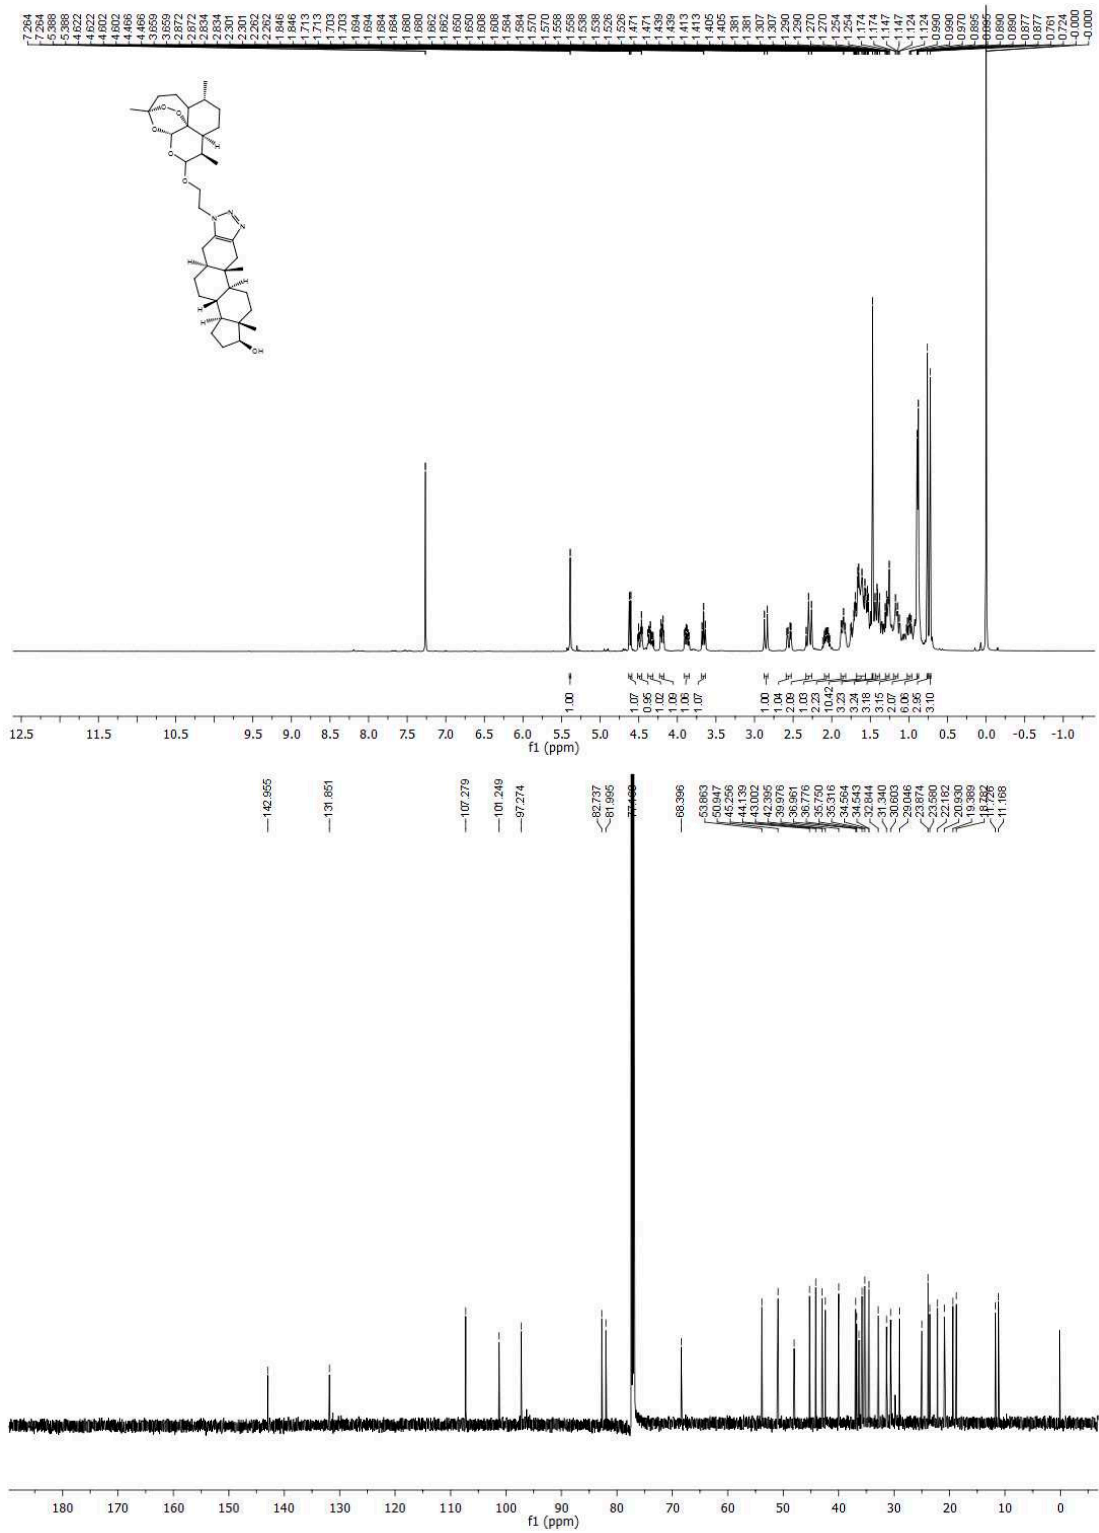

Figure S11. <sup>1</sup>H and <sup>13</sup>C spectra of 8k.

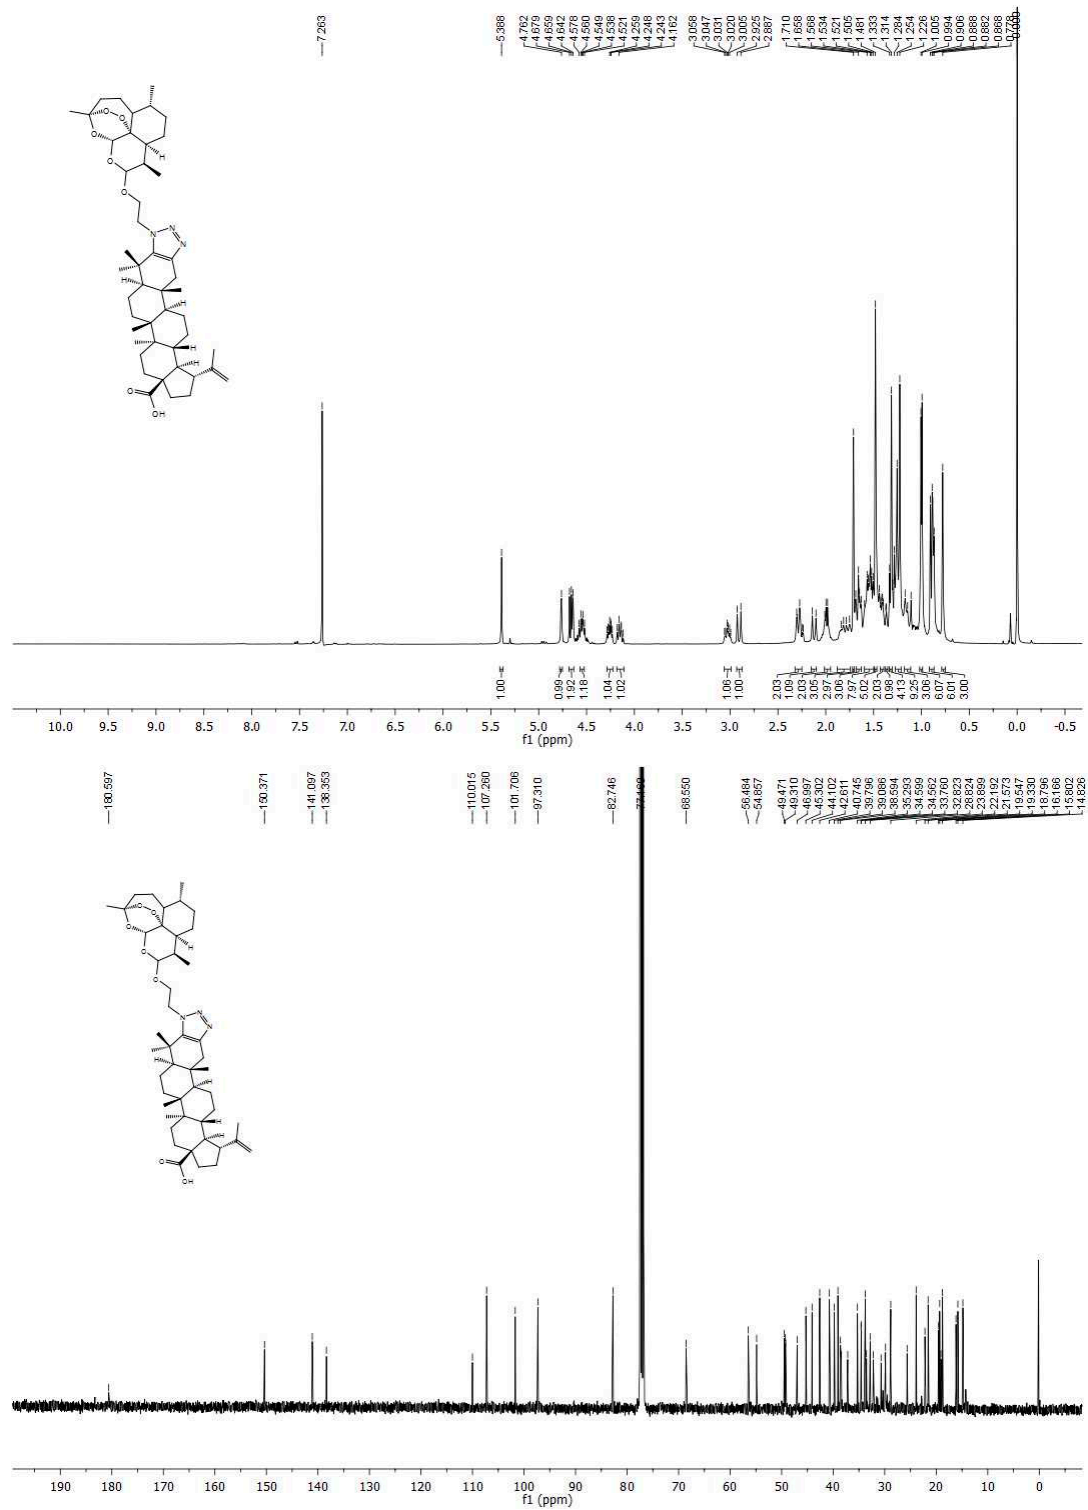

Figure S12. <sup>1</sup>H and <sup>13</sup>C spectra of 8l.

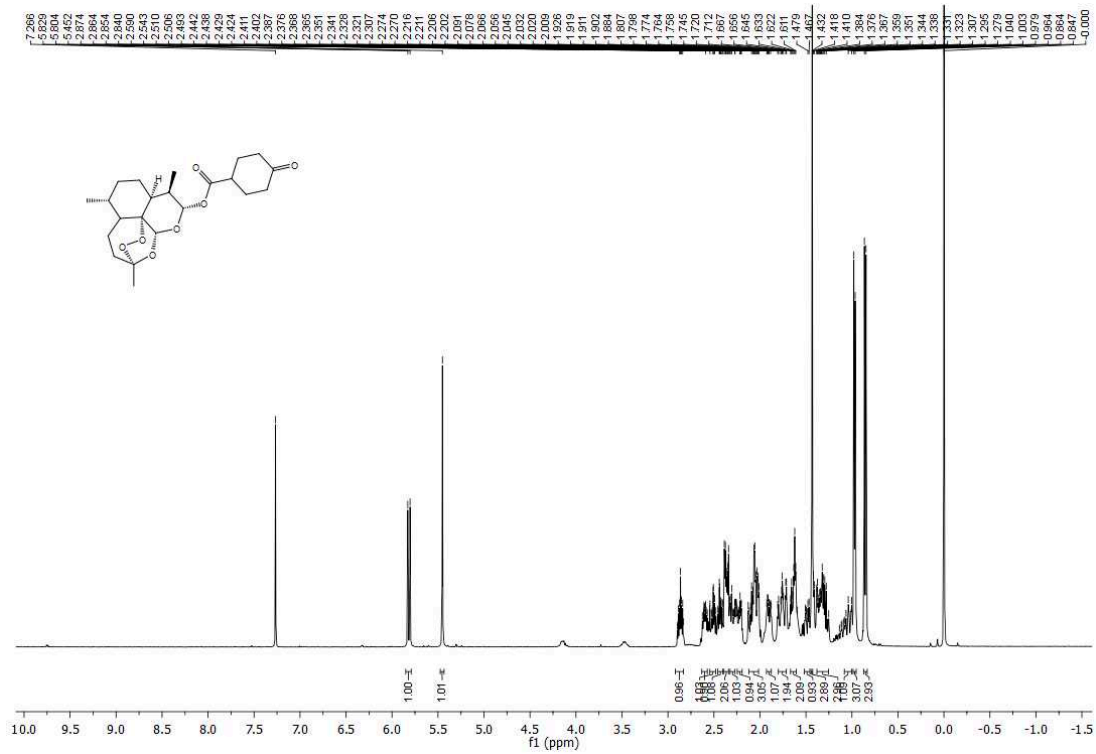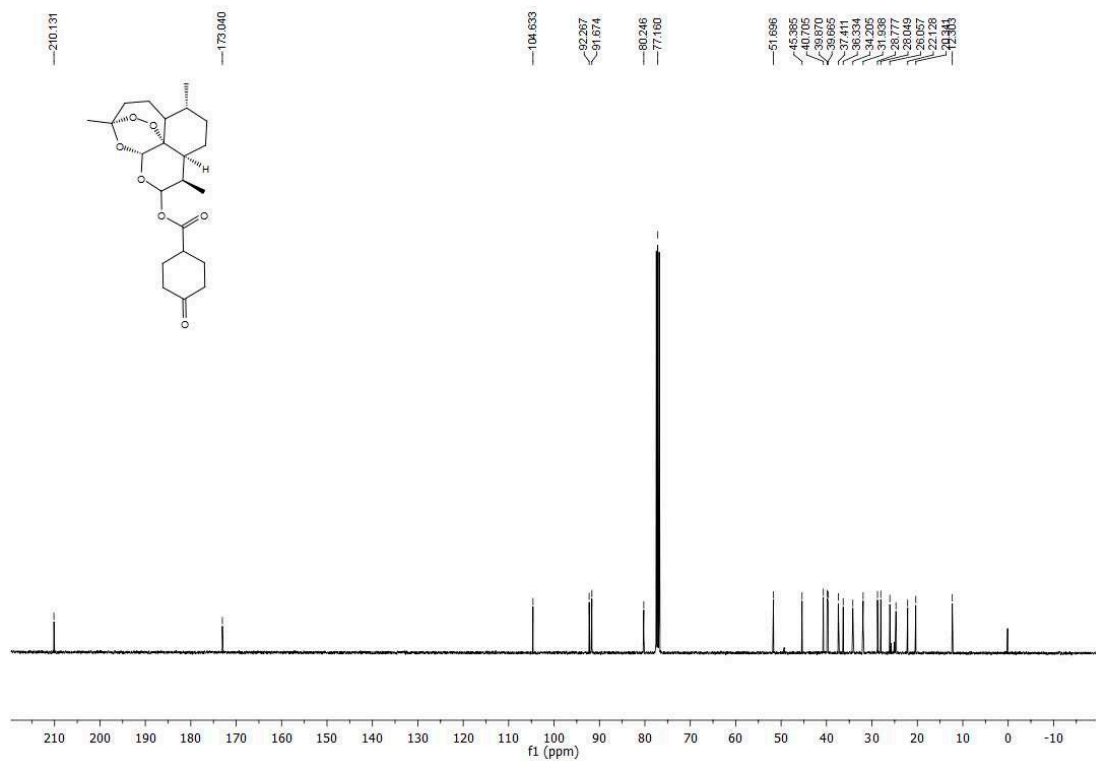

Figure S13.  $^1\text{H}$  and  $^{13}\text{C}$  spectra of 9.

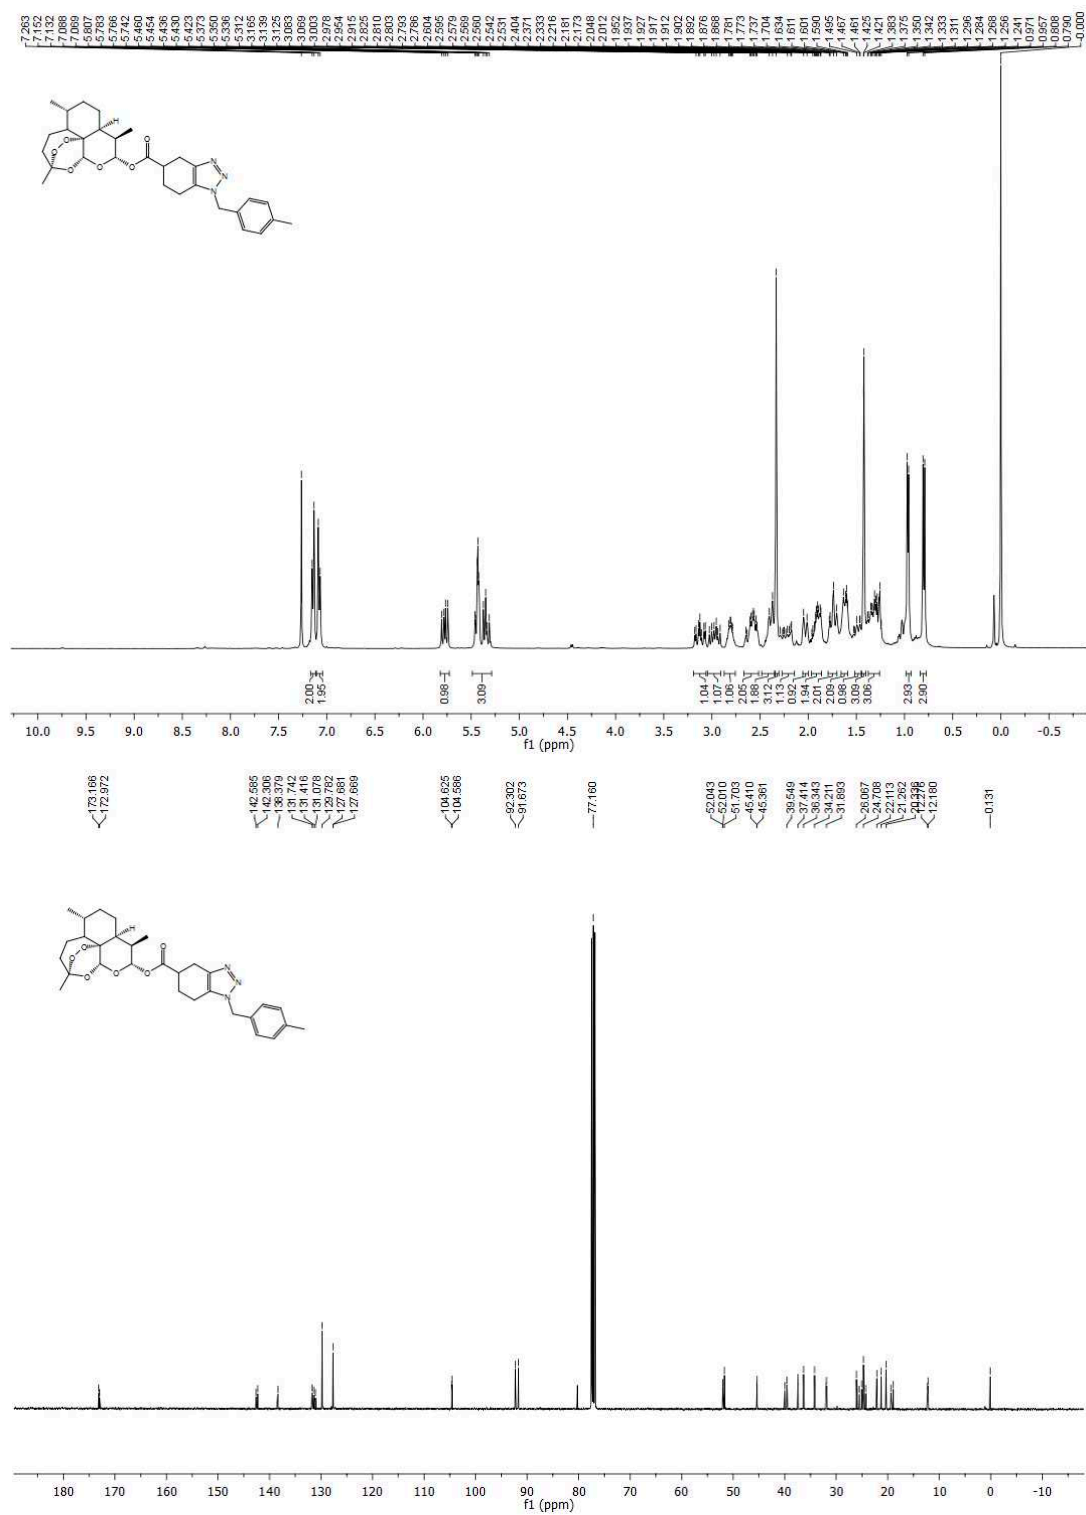

Figure S14. <sup>1</sup>H and <sup>13</sup>C spectra of 11a.

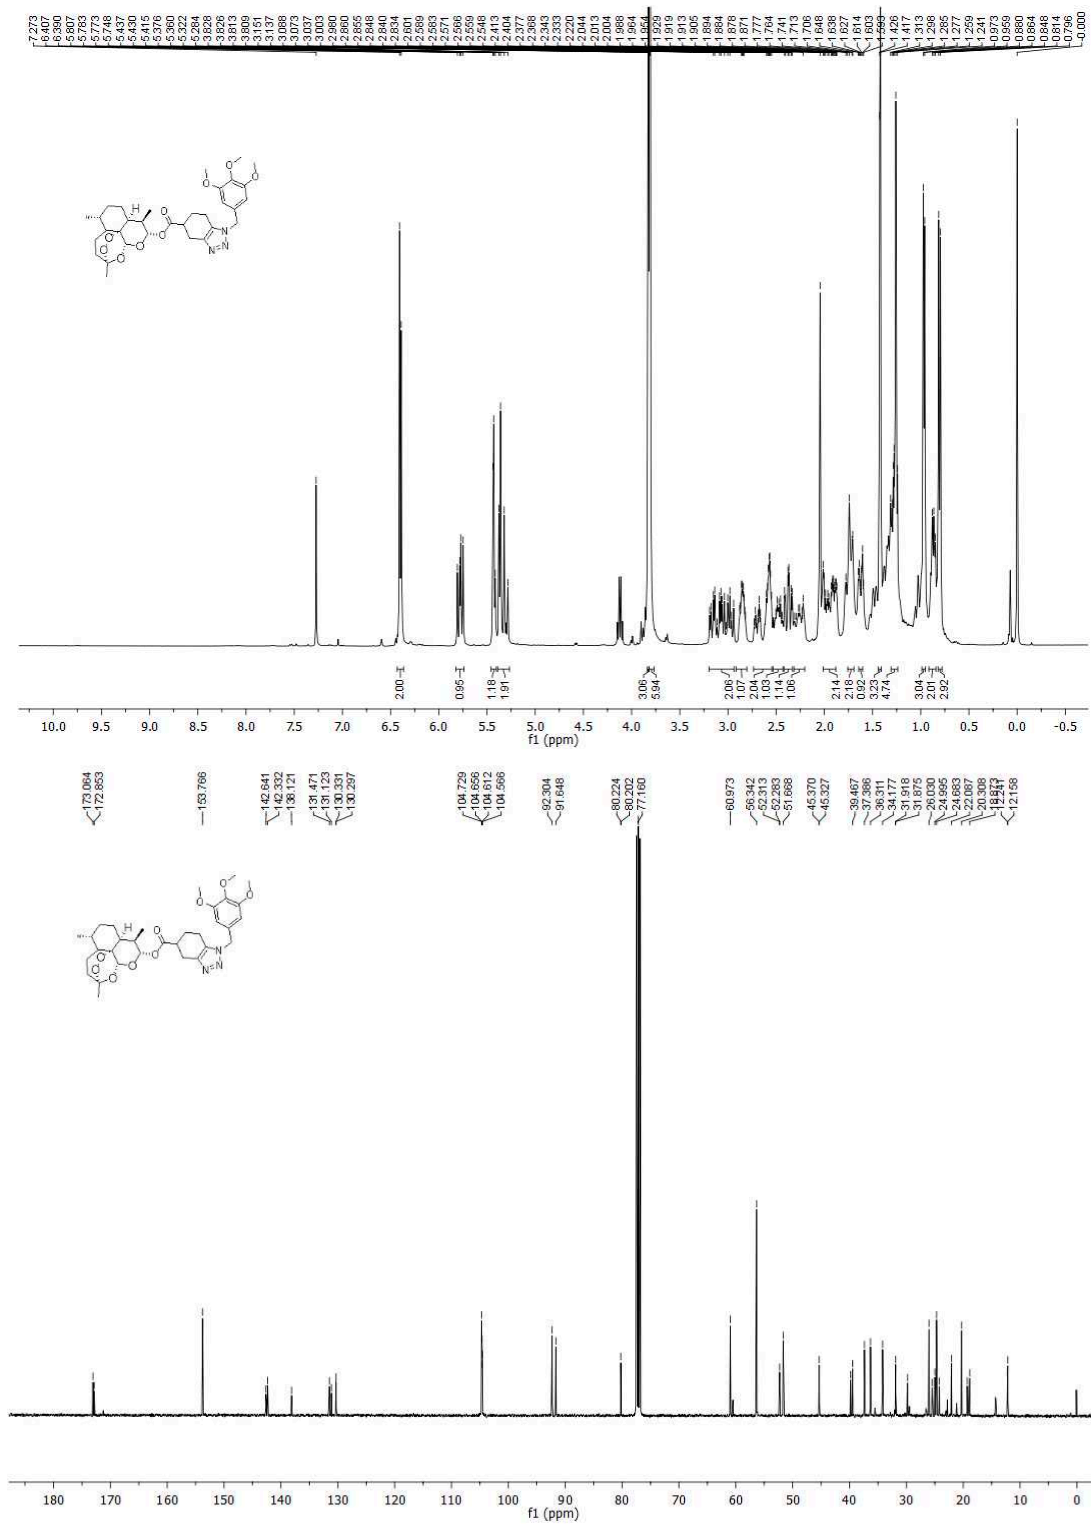

Figure S15. <sup>1</sup>H and <sup>13</sup>C spectra of 11b.

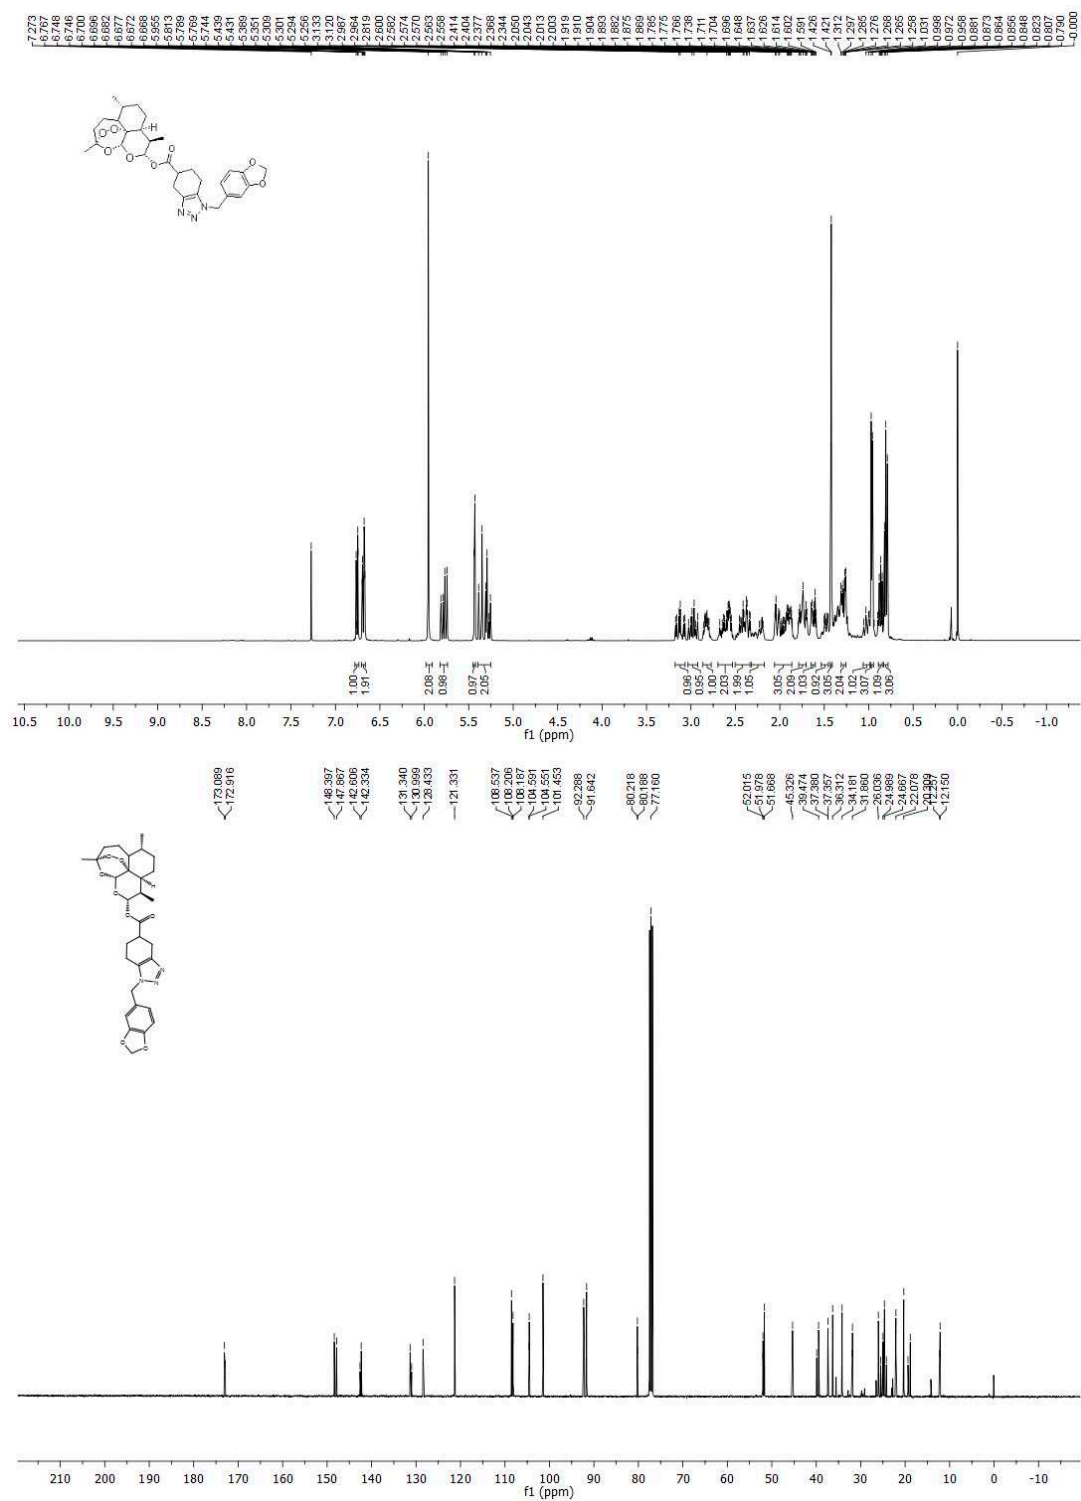

Figure S16. <sup>1</sup>H and <sup>13</sup>C spectra of 11c.



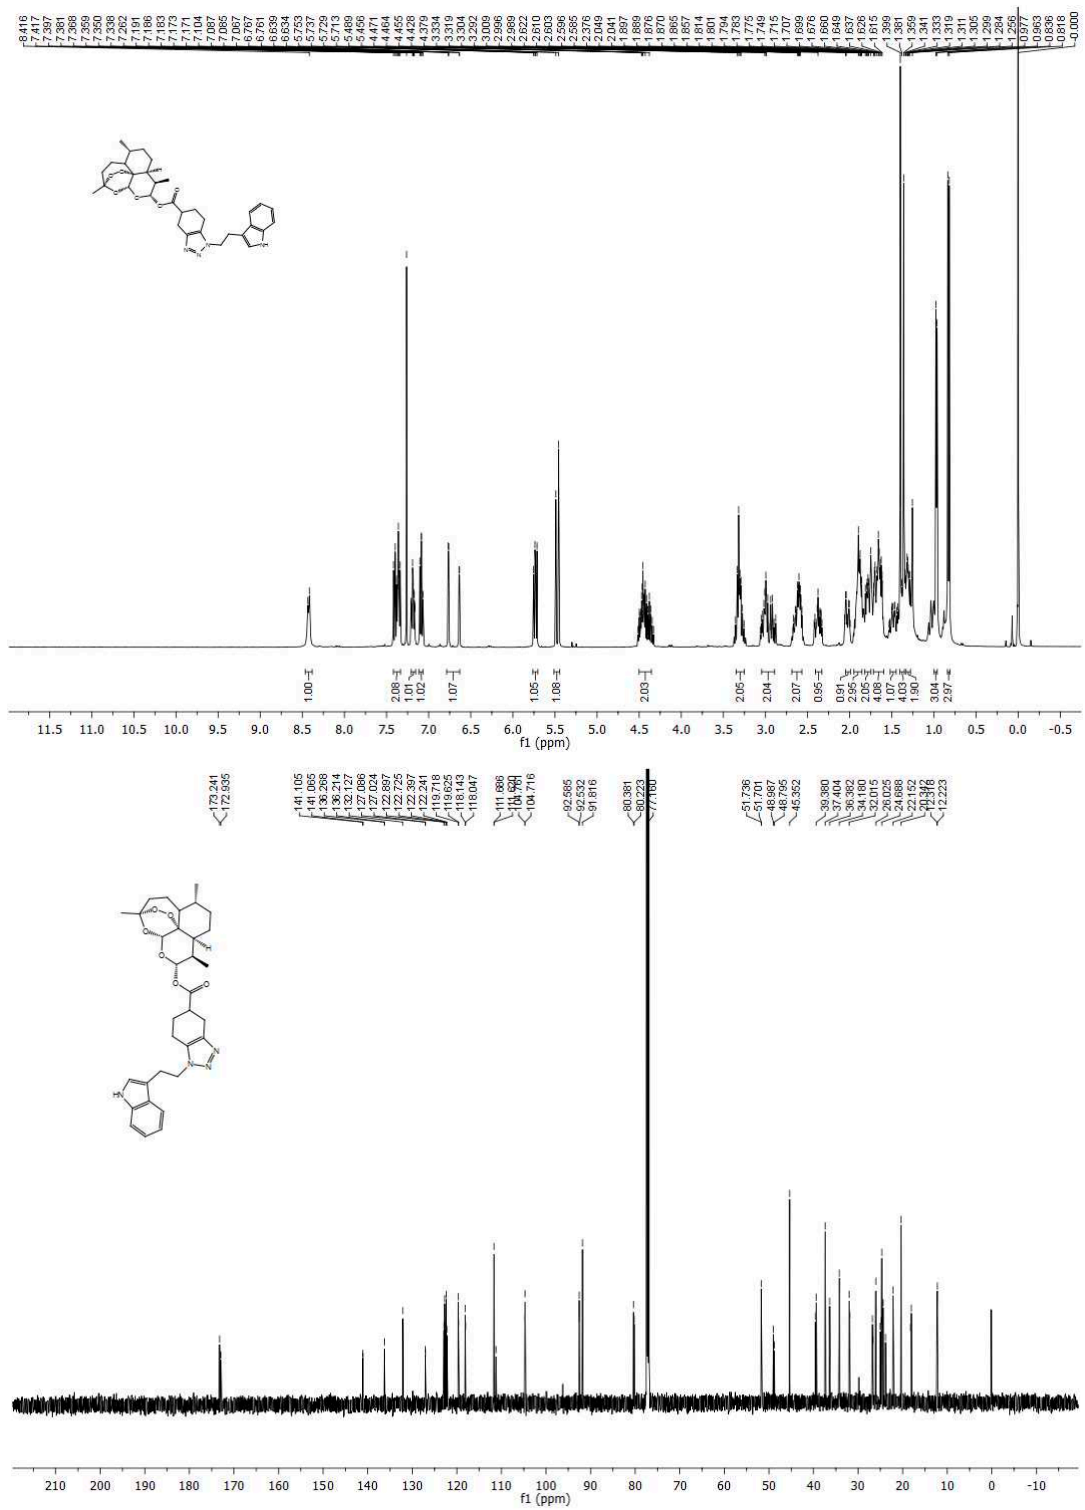

**Figure S17.** <sup>1</sup>H and <sup>13</sup>C spectra of 11d.
